# Supplementary material for: Incidence and Genomic Background of Antibiotic Resistance in Food-Borne and Clinical Isolates of Salmonella enterica Serovar Derby from Spain
Source: MDPI journal article supplement (doi:10.3390/antibiotics12071204), 2023-07-19
Supplement: s1 [file s1]

Supplementary material

# Incidence and genomic background of antibiotic resistance in food-borne and clinical isolates of *Salmonella enterica* serovar Derby from Spain

**Table S1.** Primers used for detection of resistance genes, amplification conditions and size of expected amplicons.

| Target                            | Sequence 5'-3'                                | Tm | Amplicon (bp) | Reference  |
|-----------------------------------|-----------------------------------------------|----|---------------|------------|
| <i>aadA1</i> -like                | GTGGATGGCGGCCTGAAGCC/<br>ATTGCCCAGTCGGCAGCG   | 70 | 526           | [62]       |
| <i>aadA2</i>                      | TGTTGGTTACTGTGGCCGTA/<br>GATCTCGCCTTTCACAAAGC | 56 | 623           | [63]       |
| <i>strA</i>                       | CTTGGTGATAACGGCAATTC/<br>CCAATCGCAGATAGAAGGC  | 60 | 669           | [64]       |
| <i>strB</i>                       | ATCGTCAAGGGATTGAAACC/<br>GGATCGTAGAACATATTGGC | 60 | 509           | [64]       |
| <i>bla</i> <sub>TEM-1</sub> -like | TTGGGTGCACGAGTGGGT/<br>TAATTGTTGCCGGGAAGC     | 55 | 503           | [65]       |
| <i>bla</i> <sub>OXA-1</sub> -like | AGCAGCGCCAGTGCATCA/<br>ATTCGACCCCAAGTTTCC     | 60 | 708           | [28]       |
| <i>bla</i> <sub>PSE-1</sub>       | CGCTTCCCGTTAACAAGTAC/<br>CTGGTTCATTTCAGATAGCG | 65 | 419           | [62]       |
| <i>fosA7</i>                      | CAGTCGGGATGCTAAATCTC/<br>GATACTGGCGCTTACCTTAC | 58 | 267           | This study |
| <i>sul1</i>                       | CTTCGATGAGAGCCGGCGGC/<br>GCAAGGCGGAAACCCGCGCC | 65 | 436           | [62]       |

|               |                                               |    |     |      |
|---------------|-----------------------------------------------|----|-----|------|
| <i>sul2</i>   | TCAACATAACCTCGGACAGT/<br>GATGAAGTCAGCTCCACCT  | 55 | 707 | [66] |
| <i>sul3</i>   | GAGCAAGATTTTTGGAATCG/<br>CTAACCTAGGGCTTTGGA   | 50 | 773 | [30] |
| <i>tet(A)</i> | GCTACATCCTGCTTGCCTTC/<br>CATAGATCGCCGTGAAGAGG | 55 | 210 | [67] |
| <i>tet(B)</i> | TTGGTTAGGGGCAAGTTTTG/<br>GTAATGGGCCAATAACACCG | 55 | 659 | [67] |
| <i>tet(C)</i> | CTTGAGAGCCTTCAACCCAG/<br>ATGGTCGTCATCTACCTGCC | 55 | 428 | [67] |
| <i>tet(G)</i> | GCTCGGTGGTATCTCTGC/<br>AGCAACAGAATCGGGAAC     | 55 | 500 | [28] |
| <i>tet(M)</i> | GTGGACAAAGGTACAACGAG/<br>CGGTAAAGTTCGTCACACAC | 57 | 406 | [29] |

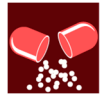

**Table S2.** Accession numbers of *Salmonella enterica* serovar Derby isolates obtained from food and clinical samples in Spain, and parameters related to the quality of the assemblies.

| Isolate <sup>a</sup> | Kmer | Contigs | N50    | Longest contig<br>(bp) | Total bp<br>in contigs | Contigs<br>> 1 kb | GenBank<br>accession number |
|----------------------|------|---------|--------|------------------------|------------------------|-------------------|-----------------------------|
| LSP 218/06           | 127  | 93      | 397161 | 685719                 | 4979598                | 39                | JAPWTI000000000             |
| LSP 71/07            | 127  | 85      | 473222 | 1641246                | 4834536                | 29                | JAPWTA000000000             |
| LSP 247/07           | 127  | 83      | 473406 | 1480285                | 4835929                | 25                | JAPWTF000000000             |
| LSP 14/08            | 127  | 101     | 375436 | 897376                 | 4843242                | 36                | JAPWSX000000000             |
| LSP 138/08           | 127  | 124     | 487459 | 1641081                | 4855858                | 35                | JAPWTD000000000             |
| LSP 63/09            | 127  | 103     | 414700 | 952109                 | 4914147                | 34                | JAPWSZ000000000             |
| LSP 217/09           | 127  | 111     | 165660 | 707665                 | 5076596                | 53                | JASTWD000000000             |
| LSP 293/09           | 127  | 77      | 473422 | 860081                 | 4834348                | 24                | JAPWTG000000000             |
| LSP 176/10           | 127  | 88      | 317905 | 317905                 | 4951122                | 31                | JAPWTE000000000             |
| LSP 199/10           | 127  | 85      | 409282 | 1200751                | 4973614                | 33                | JASNGD000000000             |
| LSP 73/12            | 127  | 233     | 76664  | 214620                 | 4907238                | 147               | JAPWGG000000000             |
| LSP 217/12           | 127  | 236     | 60780  | 272135                 | 4878792                | 164               | JAPWGB000000000             |
| LSP 393/13           | 127  | 78      | 473343 | 860016                 | 4843491                | 28                | JASJEL000000000             |
| LSP 123/15           | 127  | 83      | 457230 | 457230                 | 4825116                | 28                | JAPWTC000000000             |
| LSP 318/15           | 127  | 87      | 462555 | 1541386                | 4921753                | 30                | JAPWTH000000000             |
| LSP 25/16            | 127  | 81      | 326393 | 605518                 | 4805373                | 31                | JAPWSY000000000             |
| LSP 82/16            | 127  | 233     | 64096  | 242078                 | 4769093                | 157               | JAPWGF000000000             |
| LSP 91/16            | 127  | 272     | 59058  | 244242                 | 4756890                | 185               | JAPWGE000000000             |
| LSP 101/16           | 127  | 111     | 537578 | 1477530                | 4904217                | 35                | JAPWTB000000000             |
| LSP 198/16           | 127  | 243     | 75300  | 241746                 | 4768307                | 163               | JAPWGC000000000             |
| LSP 356/16           | 127  | 84      | 276140 | 599614                 | 4832529                | 31                | JASIRX000000000             |
| LSP 20/18            | 127  | 71      | 473481 | 1641750                | 4840526                | 23                | JASIRW000000000             |

<sup>a</sup>, LSP, “Laboratorio de Salud Pública”, Asturias, Spain.

**Table S3.** Pairwise distance matrix calculated from SNP in the genomes of *Salmonella enterica* serovar Derby isolates obtained from food and clinical samples in Spain.

|            | LSP 101/16 | LSP 123/15 | LSP 138/08 | LSP 14/08 | LSP 176/10 | LSP 198/16 | LSP 199/10 | LSP 20/18 | LSP 217/09 | LSP 217/12 | LSP 218/06 | LSP 247/07 | LSP 25/16 | LSP 293/08 | LSP 318/15 | LSP 393/14 | LSP 536/16 | LSP 63/09 | LSP 71/07 | LSP 73/12 | LSP 82/16 | LSP 91/16 |
|------------|------------|------------|------------|-----------|------------|------------|------------|-----------|------------|------------|------------|------------|-----------|------------|------------|------------|------------|-----------|-----------|-----------|-----------|-----------|
| LSP 101/16 | 0          | 161        | 237        | 236       | 93         | 120        | 93         | 263       | 214        | 102        | 220        | 251        | 150       | 247        | 253        | 245        | 115        | 246       | 238       | 248       | 2         | 12        |
| LSP 123/15 | 161        | 0          | 264        | 263       | 170        | 195        | 170        | 290       | 241        | 179        | 247        | 278        | 55        | 274        | 280        | 272        | 192        | 273       | 265       | 275       | 163       | 173       |
| LSP 138/08 | 237        | 264        | 0          | 35        | 246        | 267        | 246        | 62        | 109        | 253        | 115        | 50         | 253       | 46         | 42         | 44         | 266        | 45        | 37        | 37        | 239       | 249       |
| LSP 14/08  | 236        | 263        | 35         | 0         | 243        | 266        | 243        | 57        | 108        | 250        | 114        | 45         | 252       | 41         | 51         | 39         | 265        | 40        | 36        | 46        | 238       | 248       |
| LSP 176/10 | 93         | 170        | 246        | 243       | 0          | 129        | 2          | 272       | 223        | 21         | 229        | 260        | 159       | 256        | 262        | 254        | 124        | 255       | 247       | 257       | 95        | 105       |
| LSP 198/16 | 120        | 195        | 267        | 266       | 129        | 0          | 129        | 293       | 244        | 138        | 250        | 281        | 184       | 277        | 283        | 275        | 103        | 276       | 268       | 278       | 122       | 130       |
| LSP 199/10 | 93         | 170        | 246        | 243       | 2          | 129        | 0          | 272       | 223        | 21         | 229        | 260        | 159       | 256        | 262        | 254        | 124        | 255       | 247       | 257       | 95        | 105       |
| LSP 20/18  | 263        | 290        | 62         | 57        | 272        | 293        | 272        | 0         | 135        | 279        | 141        | 58         | 279       | 54         | 78         | 52         | 292        | 43        | 63        | 73        | 265       | 275       |
| LSP 217/09 | 214        | 241        | 109        | 108       | 223        | 244        | 223        | 135       | 0          | 230        | 40         | 123        | 230       | 119        | 125        | 117        | 243        | 118       | 110       | 120       | 216       | 226       |
| LSP 217/12 | 102        | 179        | 253        | 250       | 21         | 138        | 21         | 279       | 230        | 0          | 236        | 267        | 168       | 263        | 269        | 261        | 133        | 262       | 254       | 264       | 104       | 114       |
| LSP 218/06 | 220        | 247        | 115        | 114       | 229        | 250        | 229        | 141       | 40         | 236        | 0          | 129        | 236       | 125        | 131        | 123        | 249        | 124       | 116       | 126       | 222       | 232       |
| LSP 247/07 | 251        | 278        | 50         | 45        | 260        | 281        | 260        | 58        | 123        | 267        | 129        | 0          | 267       | 10         | 66         | 40         | 280        | 41        | 51        | 61        | 253       | 263       |
| LSP 25/16  | 150        | 55         | 253        | 252       | 159        | 184        | 159        | 279       | 230        | 168        | 236        | 267        | 0         | 263        | 269        | 261        | 181        | 262       | 254       | 264       | 152       | 162       |
| LSP 293/08 | 247        | 274        | 46         | 41        | 256        | 277        | 256        | 54        | 119        | 263        | 125        | 10         | 263       | 0          | 62         | 36         | 276        | 37        | 47        | 57        | 249       | 259       |
| LSP 318/15 | 253        | 280        | 42         | 51        | 262        | 283        | 262        | 78        | 125        | 269        | 131        | 66         | 269       | 62         | 0          | 60         | 282        | 61        | 53        | 37        | 255       | 265       |
| LSP 393/14 | 245        | 272        | 44         | 39        | 254        | 275        | 254        | 52        | 117        | 261        | 123        | 40         | 261       | 36         | 60         | 0          | 274        | 35        | 45        | 55        | 247       | 257       |
| LSP 536/16 | 115        | 192        | 266        | 265       | 124        | 103        | 124        | 292       | 243        | 133        | 249        | 280        | 181       | 276        | 282        | 274        | 0          | 275       | 267       | 277       | 117       | 125       |
| LSP 63/09  | 246        | 273        | 45         | 40        | 255        | 276        | 255        | 43        | 118        | 262        | 124        | 41         | 262       | 37         | 61         | 35         | 275        | 0         | 46        | 56        | 248       | 258       |
| LSP 71/07  | 238        | 265        | 37         | 36        | 247        | 268        | 247        | 63        | 110        | 254        | 116        | 51         | 254       | 47         | 53         | 45         | 267        | 46        | 0         | 48        | 240       | 250       |
| LSP 73/12  | 248        | 275        | 37         | 46        | 257        | 278        | 257        | 73        | 120        | 264        | 126        | 61         | 264       | 57         | 37         | 55         | 277        | 56        | 48        | 0         | 250       | 260       |
| LSP 82/16  | 2          | 163        | 239        | 238       | 95         | 122        | 95         | 265       | 216        | 104        | 222        | 253        | 152       | 249        | 255        | 247        | 117        | 248       | 240       | 250       | 0         | 14        |
| LSP 91/16  | 12         | 173        | 249        | 248       | 105        | 130        | 105        | 275       | 226        | 114        | 232        | 263        | 162       | 259        | 265        | 257        | 125        | 258       | 250       | 260       | 14        | 0         |

min: 2 max: 293; SNP, Single Nucleotide Polymorphism; LSP, "Laboratorio de Salud Pública", Asturias, Spain.

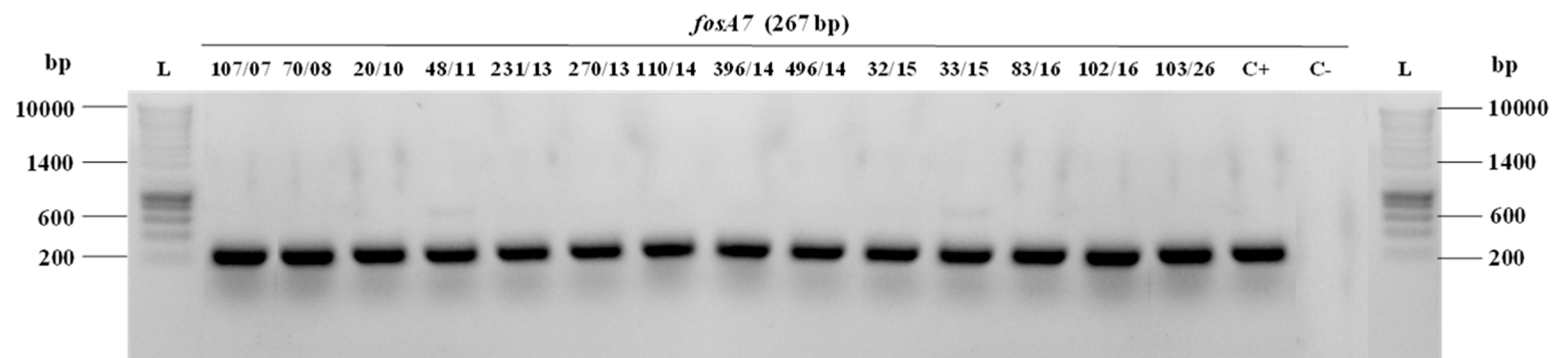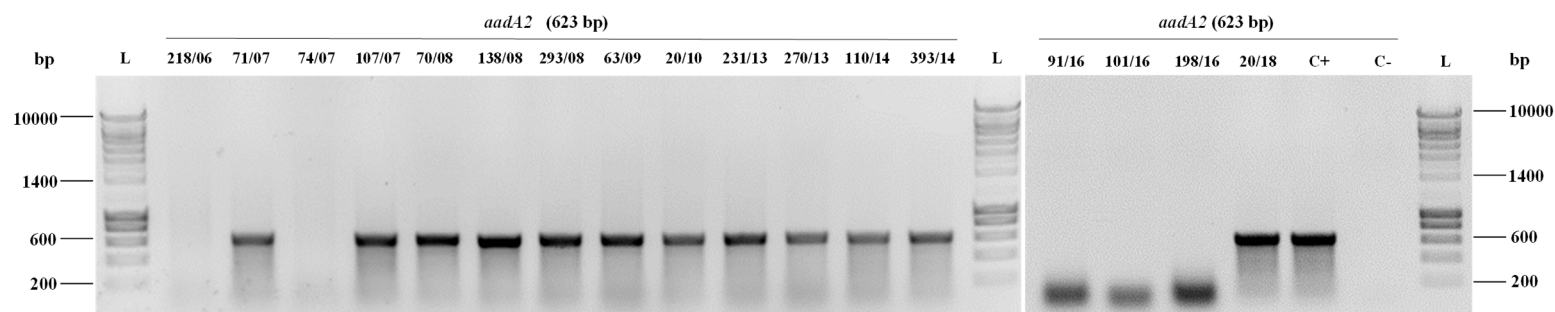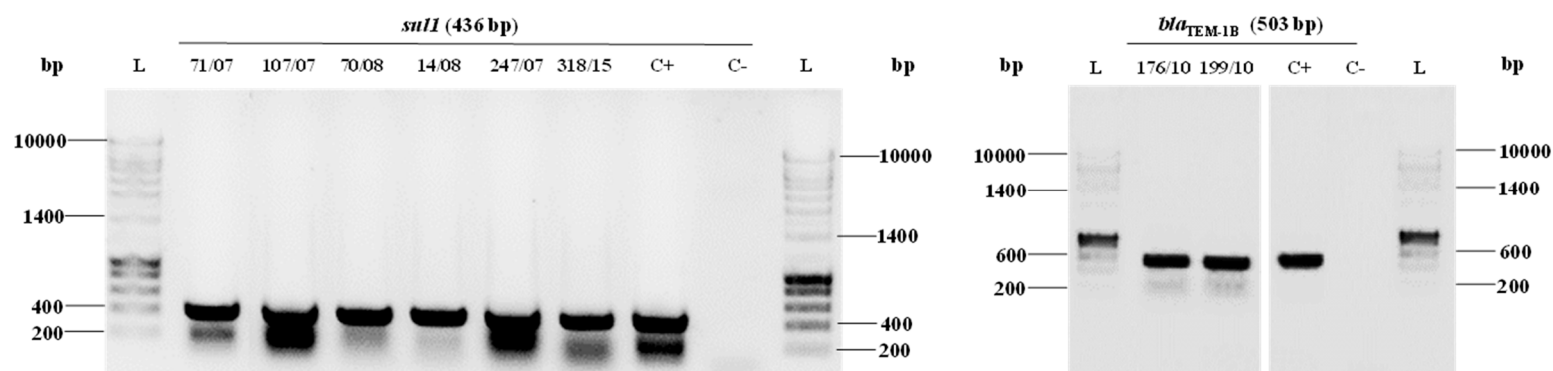

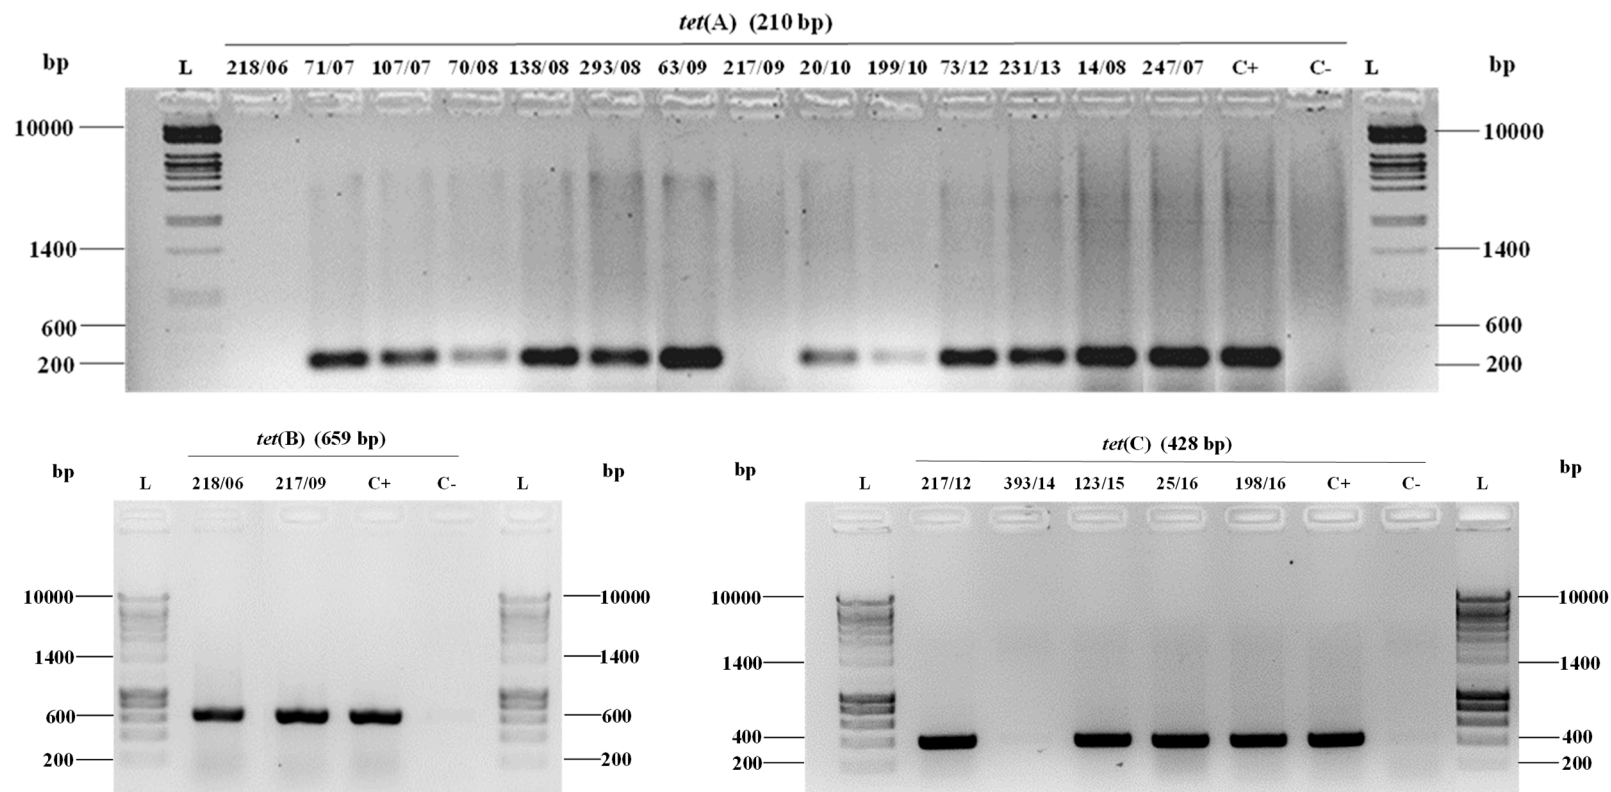

**Figure S1.** Agarose gels showing examples of PCR fragments amplified with primer pairs specific for the following resistance genes: *fosA7*, *aadA2*, *bla<sub>TEM-1</sub>*-like, *sul1*, *tet(A)*, *tet(B)* and *tet(C)*, with the size of the expected amplicons shown in parenthesis. The fragments were visualized in agarose gels (1% in TAE running buffer consisting of 40 mM Tris-acetate pH 8.6, 1 mM EDTA. Lane L, 200 bp ladder (NZYDNA Ladder III, NZYTech, Lisboa, Portugal) used as size marker. Numbers in the other lanes correspond to LSP (“Laboratorio de Salud Pública”; Asturias, Spain) isolates (see Tables 1 and 2 for details); C+, positive control; C-, negative control.

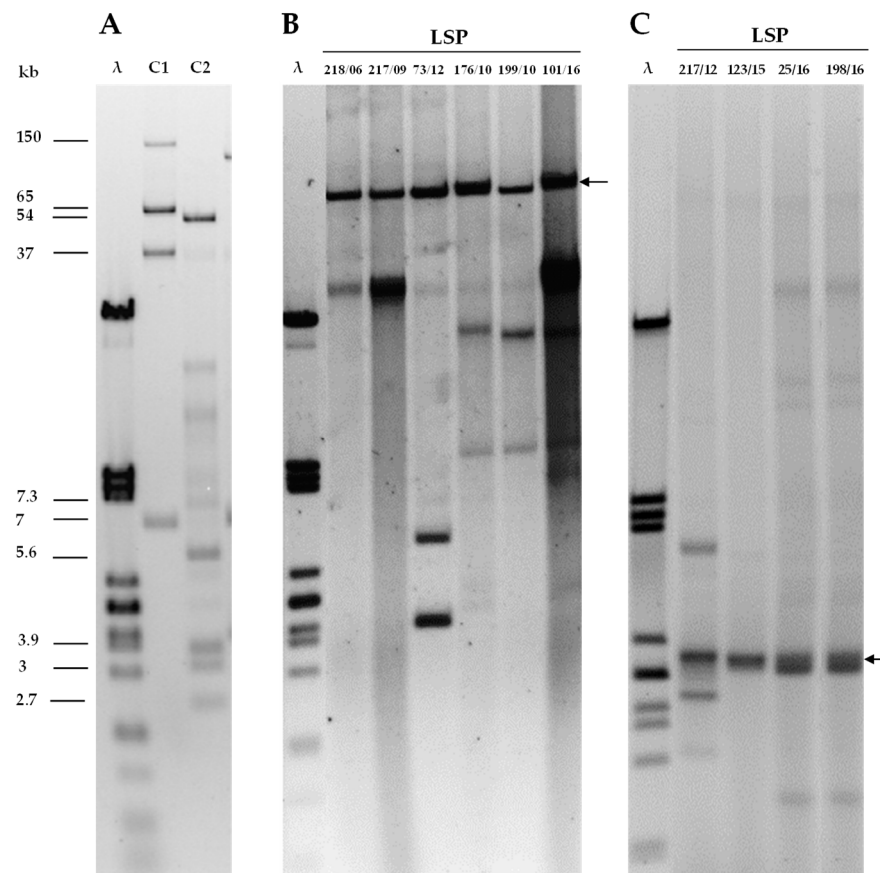

**Figure S2.** Plasmid profiles of *Salmonella enterica* serovar Derby isolates harboring resistance genes of plasmid location. Plasmids were extracted with the Kado and Liu method [70] and visualized on agarose gels (0.6% in TAE buffer; see legend to Figure S1). **A.** Size standards. Lane  $\lambda$ , lambda phage DNA digested with PstI, included for comparison. Lanes C1 and C2, plasmids extracted from *Escherichia coli* strains 39R861 and V517 [68–70], used as size references for undigested plasmid DNA. **B.** Isolates carrying IncI1-I( $\alpha$ ) plasmids (indicated with an arrow). **C.** Isolates carrying pSC101-like plasmids (indicated with an arrow). Other lanes in **B** and **C** correspond to LSP (“Laboratorio de Salud Pública”, Asturias, Spain) isolates. Please note that not all plasmids experimentally detected in the isolates were necessarily identified by PlasmidFinder (see Table 2 for comparison).



## References

28. Guerra, B.; Junker, E.; Miko, A.; Helmuth, R.; Mendoza, M.C. Characterization and localization of drug resistance determinants in multidrug-resistant, integron-carrying *Salmonella enterica* serotype Typhimurium strains. *Microb Drug Resist.* **2004**, *10*, 83–91. doi: 10.1089/1076629041310136
29. Ng, L. K., Mulvey, M.R., Martin, I., Peters, G.A., Johnson, W. Genetic characterization of antimicrobial resistance in Canadian isolates of *Salmonella* serovar Typhimurium DT104. *Antimicrob Agents Chemother.* **1999**, *43*: 3018–21. doi: 10.1128/AAC.43.12.3018
30. Perreten, V., Boerlin, P. A new sulfonamide resistance gene (*sul3*) in *Escherichia coli* is widespread in the pig population of Switzerland. *Antimicrob Agents Chemother.* **2003**, *47*: 1169–72. doi: 10.1128/AAC.47.3.1169-1172.2003
62. Sandvang, D., Aarestrup, F.M., Jensen, L. B. Characterisation of integrons and antibiotic resistance genes in Danish multiresistant *Salmonella enterica* Typhimurium DT104. *FEMS Microbiol Lett.* **1997**, *157*: 177–81. doi: 10.1111/j.1574-6968.1997.tb12770.x
63. Walker, R. A., Lindsay, E., Woodward, M.J., Ward, L.R., Threlfall, E.J. Variation in clonality and antibiotic-resistance genes among multiresistant *Salmonella enterica* serotype Typhimurium phage-type U302 (MR U302) from humans, animals and foods. *Microb Drug Resist.* **2001**, *7*:13–21. doi: 10.1089/107662901750152701
64. Madsen, L., Aarestrup F. M., Olsen J.E. Characterisation of streptomycin resistance determinants in Danish isolates of *Salmonella* Typhimurium. *Vet Microbiol.* **2000**, *75*: 73–82. doi: 10.1016/s0378-1135(00)00207-8
65. Arlet, G., Phillippon, A. Construction by polymerase chain reaction and intragenic DNA probes for three main types of transferable  $\beta$ -lactamases (TEM, SHV, CARB). *FEMS Microbiol Lett.* **1991**, *82*: 19–26. doi:10.1016/0378-1097(91)90414-6
66. Chu, C., Chiu, C. H., Wu, W. Y., Chu, C. H., Liu, T. P., Ou, J.T. Large drug resistance virulence plasmids of clinical isolates of *Salmonella enterica* serovar Choleraesuis. *Antimicrob Agents Chemother.* **2001**, *45*: 2299–303. doi: 10.1128/AAC.45.8.2299-2303.2001
67. Ng, L. K., Martin, I., Alfa, M., Mulvey, M. Multiplex PCR for the detection of tetracycline resistant genes. *Mol Cell Probes.* **2001**, *15*(4): 209–215. doi: 10.1006/mcpr.2001.0363
68. Kado, C.I., Liu, S.T. Rapid procedure for detection and isolation of large and small plasmids. *J Bacteriol* **1981**, *145*, 1365–1373. doi: 10.1128/jb.145.3.1365-1373.1981
69. Threlfall, E. J., Rowe, B., Ferguson, J.I., Ward, L.R. Characterization of plasmids conferring resistance to gentamicin and apramycin in strains of *Salmonella typhimurium* phage type 204c isolated in Britain. *J Hyg (Lond).* **1986**, *97*(3):419–26. doi: 10.1017/s0022172400063609
70. Sánchez, F., Jiménez, G., Aguilar, A., Baquero, F., Rubio, V. Plasmid pVA517C from *Escherichia coli* V517 is required for the expression of an antibiotic microcin. *J Antibiot (Tokyo).* **1986**, *39*(7):1028–30. doi: 10.7164/antibiotics.39.1028
